# Supplementary material for: Malaria parasite density and detailed qualitative microscopy enhances large-scale profiling of infection endemicity in Nigeria
Source: bioRxiv or medRxiv preprint supplement (doi:10.1101/2022.10.18.22281220), 2022-10-20
Supplement: Supplementary file [file media-1.pdf]

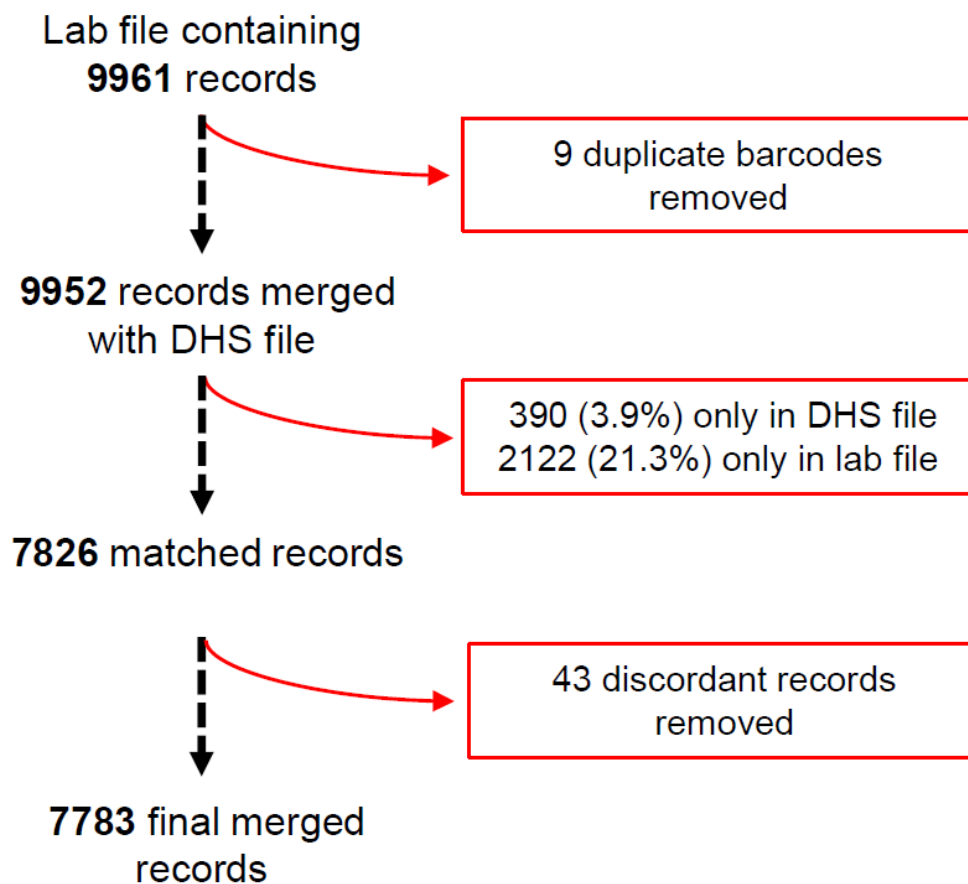

**Supplementary Figure S1.** Flow-diagram of sample filtering and database merging for the laboratory microscopy data on children up to 5 years of age sampled in the 2018 NDHS survey.

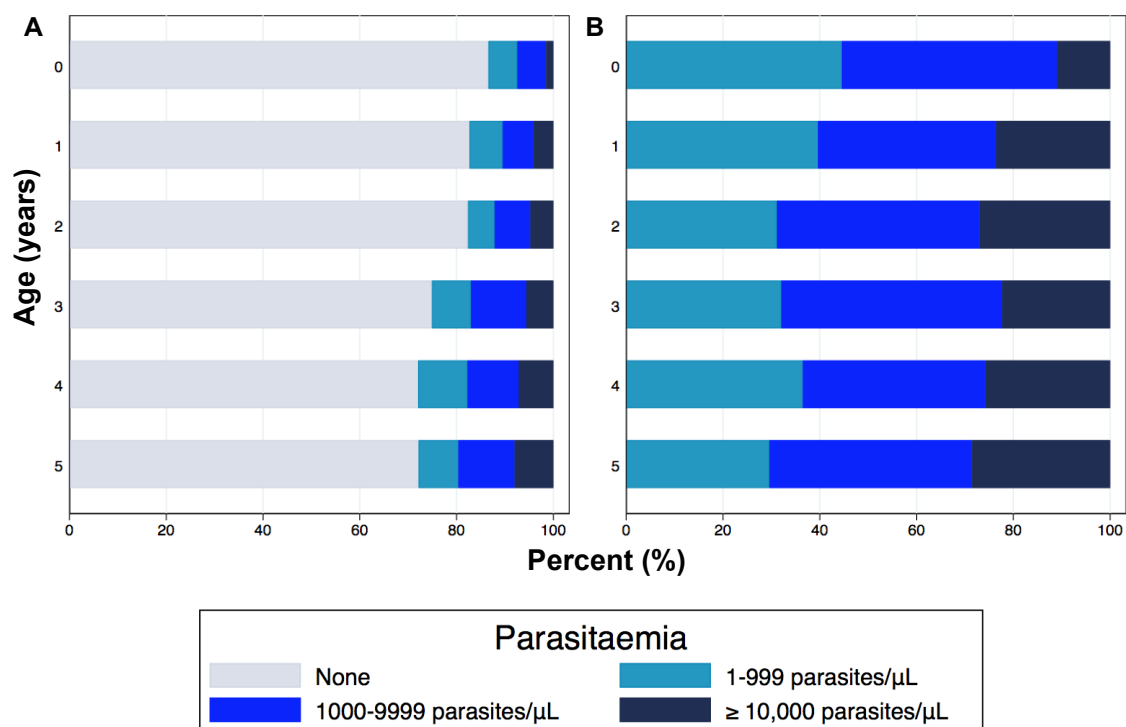

**Supplementary Figure S2.** Asexual parasite density categories of malaria parasite infections in different age groups. **A.** All individuals included in the analysis (including slide negative with zero counts as well as slide positive). **B.** Analysis of slide-positive individuals.

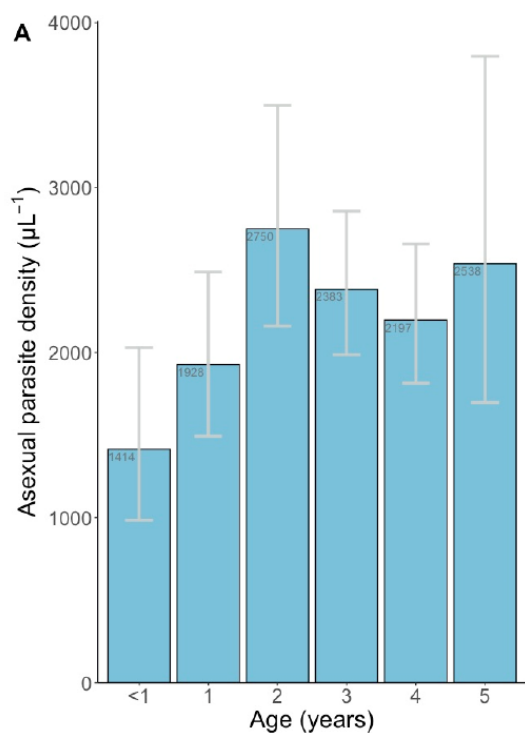

**Supplementary Figure S3.** Geometric mean parasite densities (with 95% CIs) among slide-positive individuals of different ages. Overall there was significant variation by age (Kruskal-Wallis test,  $p=0.04$ ), which was mostly attributable to lower densities in infants under one year of age.
